# Supplementary material
Source: PubMed Central journal article supplement (PMC6292441)
Supplement: NIHMS997660-supplement-Supplementary_Material.pdf [file NIHMS997660-supplement-Supplementary_Material.pdf]

**Supplemental Information**

**Selective Fc $\gamma$ R Co-engagement on APCs**

**Modulates the Activity of Therapeutic**

**Antibodies Targeting T Cell Antigens**

**Jeremy D. Waight, Dhan Chand, Sylvia Dietrich, Randi Gombos, Thomas Horn, Ana M. Gonzalez, Mariana Manrique, Lukasz Swiech, Benjamin Morin, Christine Brittsan, Antoine Tanne, Belinda Akpeng, Ben A. Croker, Jennifer S. Buell, Robert Stein, David A. Savitsky, and Nicholas S. Wilson**

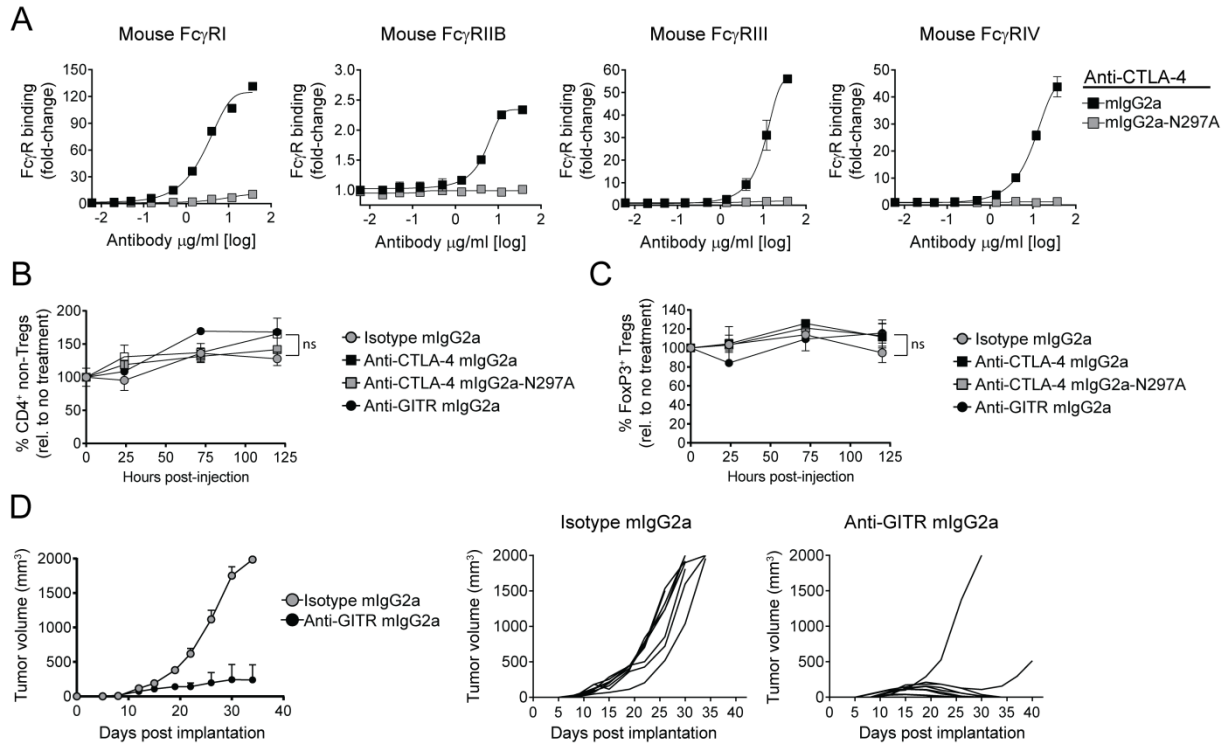

**Figure S1, related to Figure 1. *In vitro* characterization of mouse Fc $\gamma$ R binding and selectivity of intratumoral Treg cell depletion by anti-CTLA-4 mAb**

**(A)** Binding of anti-mouse CTLA-4 mAb variants (mIgG2a or mIgG2a-N297A) to CHO cells engineered to express individual mouse Fc $\gamma$  receptors. Fold-change in Fc $\gamma$ R binding was determined by flow cytometry and calculated relative to the mean fluorescence intensity (MFI) of fluorochrome-conjugated F(ab')<sub>2</sub> secondary mAb alone.

**(B, C)** CT26 tumor-bearing (50-80mm<sup>3</sup>) BALB/c mice were administered with a single 100  $\mu$ g i.p. dose of anti-CTLA-4 mAb (mIgG2a or mIgG2a-N297A), anti-GITR mIgG2a, or mIgG2a isotype control mAb. Frequency of intratumoral **(B)** CD4<sup>+</sup> non-Treg cells and **(C)** tumor-draining lymph node FoxP3<sup>+</sup> Treg cells was evaluated by flow cytometry pre- (0 hr), and post-mAb injection (24, 72, and 120 hr) (n=4 mice/treatment time-point, relative to untreated control mice).

**(D)** BALB/c mice with established CT26 tumors (50-80mm<sup>3</sup>) were administered with a single 100  $\mu$ g i.p. dose of anti-GITR mIgG2a or mIgG2a isotype control mAb. Individual tumor growth rates (n=8-9 mice/treatment group) are shown on the right.

Data are representative of three or more experiments. A two-way ANOVA was used to calculate significance in **(B, C)**. Error bars indicate SEM; ns, not significant.

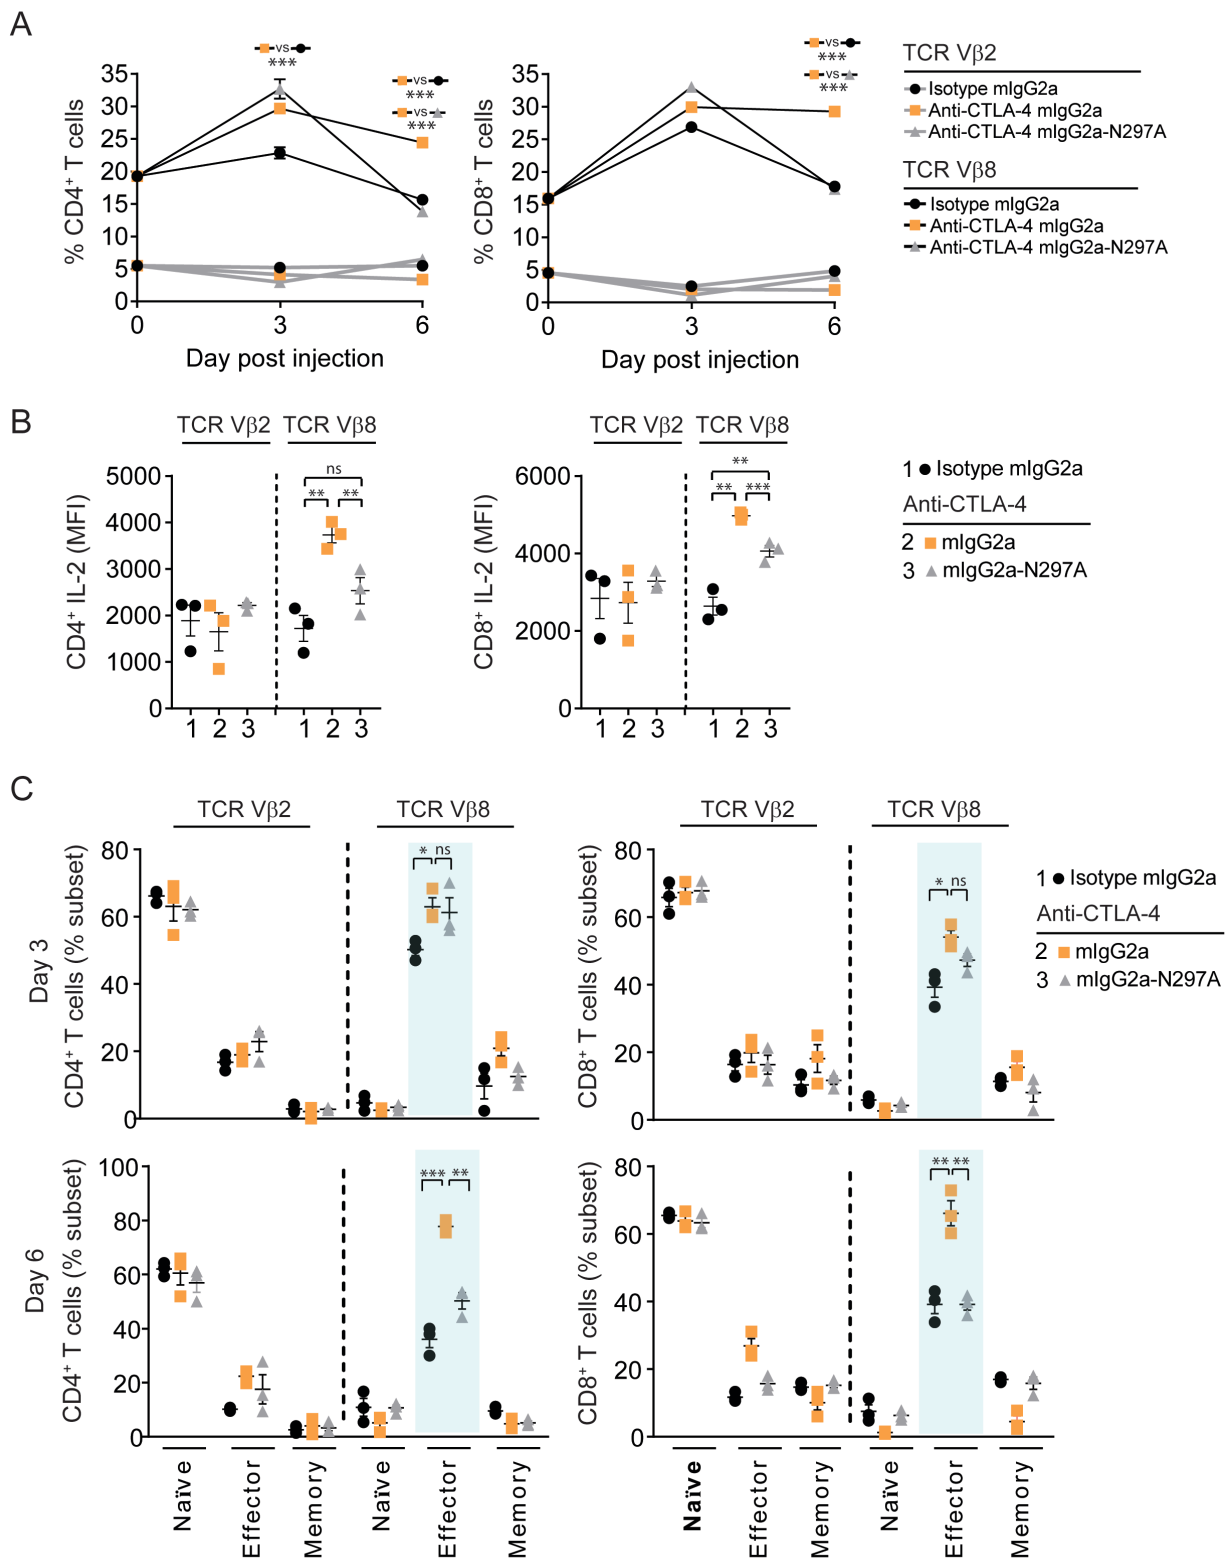

**Figure S2, related to Figure 2. FcγR co-engagement is also required for enhancement of splenic antigen-specific T cell responses by anti-CTLA-4 mAb**

**(A-C)** C57BL/6 mice were administered i.p. with 150 μg of the SEB peptide and a separate concomitant 100 μg i.p. dose of anti-CTLA-4 mAb (mIgG2a or IgG2a-N297A) or a mIgG2a isotype control mAb (n=5 mice/group).

**(A)** SEB-specific (Vβ8, black lines) and non-specific (Vβ2, grey lines) splenic T cell populations were assessed on pre- (day 0) and post-treatment (day 3 and 6) by flow cytometry. A two-way ANOVA was used to calculate significance in **(A)**.

**(B)** IL-2 expression (MFI) by Vβ8<sup>+</sup> and Vβ2<sup>+</sup> T cells was evaluated by intracellular flow cytometry and shown for day 6 post-SEB/mAb administration.

**(C)** Naïve (CD44<sup>-</sup> CD62L<sup>+</sup>), effector (CD44<sup>+</sup> CD62L<sup>-</sup>) and memory (CD44<sup>+</sup> CD62L<sup>+</sup>) T cells were evaluated on days 3 and 6 (post-treatment) by flow cytometry and represented as a percentage of total Vβ8<sup>+</sup> or Vβ2<sup>+</sup> T cells.

Data are representative of three or more experiments. A Student's t test was used to calculate significance in **(B, C)**. Error bars indicate SEM; ns, not significant; \*, p<0.05; p<0.01; \*\*\*, p<0.001.

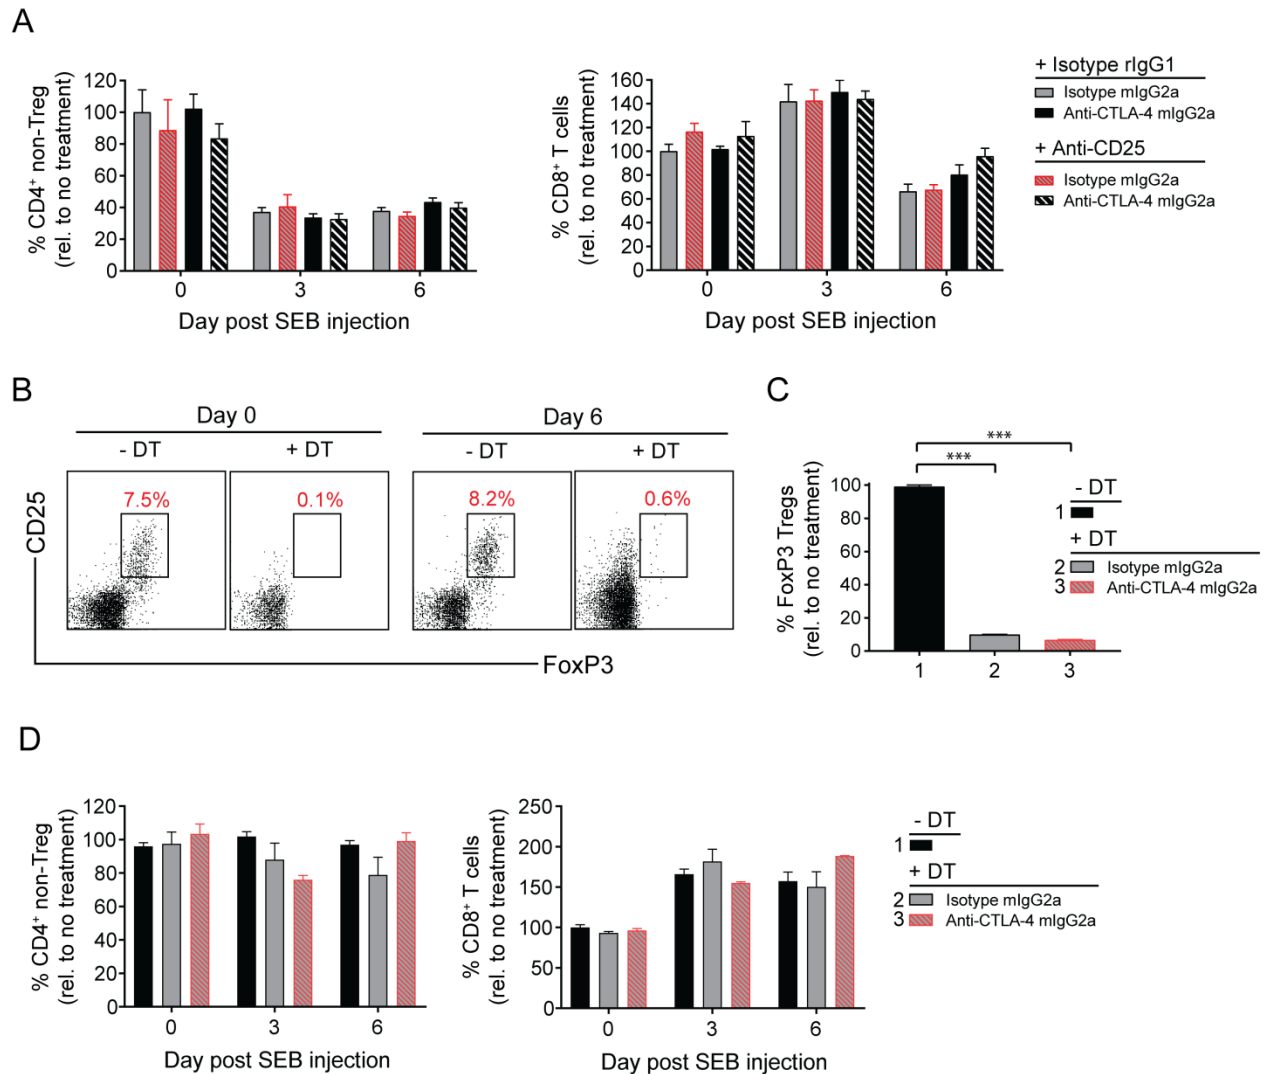

**Figure S3, related to Figure 3. Anti-CD25 mAb- and FoxP3<sup>DTR</sup>-mediated depletion is potent and selective for Treg cells**

(A) On day -10, C57BL/6 mice were administered with a single i.p. 250 µg dose of anti-CD25 mAb (clone PC61). On Day 0, mice were administered with separate i.p. injections SEB and anti-CTLA-4 mlgG2a mAb (n=4 mice/group). The frequency of CD4<sup>+</sup> non-Treg cell and CD8<sup>+</sup> T cell populations in control and anti-CD25 mAb-treated mice pre- (day 0) and post-SEB/mAb injection (days 3 and 6) was assessed in the peripheral blood by flow cytometry.

(B-D) FoxP3<sup>DTR</sup> mice were administered with 100 µg i.p. of diphtheria toxin (DT) on days -2 and -1 to systemically deplete FoxP3-expressing Treg cells.

(B) Representative flow cytometry plots of FoxP3<sup>+</sup> Treg cells from the peripheral blood of FoxP3<sup>DTR</sup> mice pre- (day 0) and post-SEB/mAb injection (day 6).

(C) Frequency of FoxP3<sup>+</sup> Treg cells in DT treated and untreated (normalized to 100%) FoxP3<sup>DTR</sup> mice pre- (day 0) and post-SEB/mAb injection (day 6) was assessed in the spleen by flow cytometry.

**(D)** Frequency of CD4<sup>+</sup> non-Treg cell and CD8<sup>+</sup> T cell populations in DT treated and untreated (normalized to 100%) FoxP3<sup>DTR</sup> mice pre- (day 0) and post-SEB/mAb injection (days 3 and 6) was assessed in the peripheral blood by flow cytometry.

Data are representative of three or more experiments. A Student's t test was used to calculate significance in **(C)**. Error bars indicate SEM; \*\*\*p < 0.001.

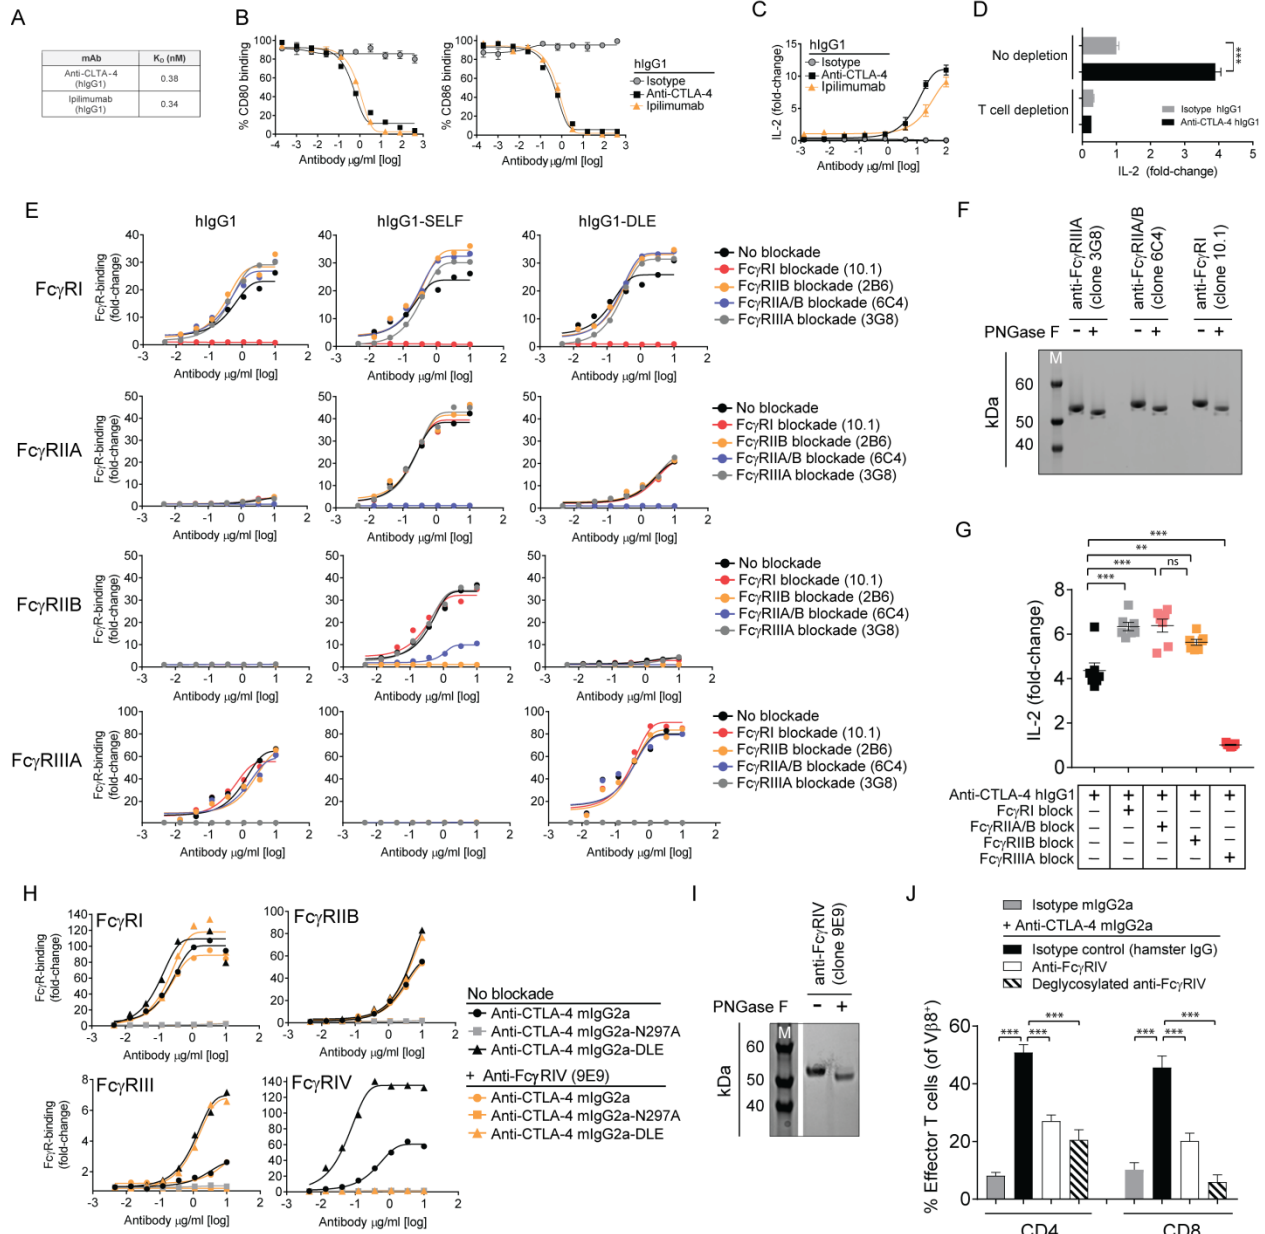

**Figure S4, related to Figure 4. Characterization of CTLA-4 mAbs and FcγR blocking antibodies.**

(A) Surface plasmon resonance (SPR)-based affinity assessment of anti-human CTLA-4 mAb and ipilimumab to recombinant human CTLA-4 protein (dimeric, Fc-fusion).

(B) Blockade of the CTLA-4 binding to CD80 and CD86 with increasing concentrations of anti-CTLA-4 mAb, ipilimumab, or isotype control (hIgG1).

(C) IL-2 production (day 4) from human PBMCs stimulated with 100 ng/ml of SEA peptide and increasing concentrations of anti-CTLA-4 mAb, ipilimumab, or isotype control (hIgG1).

(D) IL-2 production (day 4) from PBMCs with or without depletion of T cells following stimulation with SEA peptide and anti-CTLA-4 hIgG1 or isotype control mAb (10  $\mu$ g/ml).

**(E)** Binding of anti-human CTLA-4 mAb variants (hIgG1, hIgG1-DLE, and hIgG1-SELF) to CHO cells expressing different human Fc $\gamma$  with or without pre-blockade using specific deglycosylated Fc $\gamma$ R blocking antibodies (10  $\mu$ g/ml of anti-Fc $\gamma$ RIIA/B clone 6C4, -Fc $\gamma$ RIIA clone 3G8, or aglycosylated anti-Fc $\gamma$ RIIB clone 2B6; 20  $\mu$ g/ml was used for anti-Fc $\gamma$ RI clone 10.1). Fold-change in Fc $\gamma$ R binding was determined by flow cytometry and calculated relative to the MFI of fluorochrome-conjugated F(ab')<sub>2</sub> secondary mAb alone (**E** and **H**).

**(F)** Anti-human Fc $\gamma$ R-specific mAbs were deglycosylated with PNGase F. To visualize glycosylation-dependent band shifts of the IgG heavy chain, samples were evaluated by reducing SDS-PAGE. The aglycosylated anti-human Fc $\gamma$ RIIB antibody (mIgG2a-N297A, clone 2B6) was excluded from PNGase F treatment. M refers to marker ladder.

**(G)** IL-2 production (day 4) by PBMCs stimulated with SEA peptide (100 ng/ml) and anti-CTLA-4 hIgG1 (10  $\mu$ g/ml) with or without blockade of select Fc $\gamma$  receptors with deglycosylated anti-Fc $\gamma$ R mAbs.

**(H)** Binding of anti-mouse CTLA-4 mAb variants (mIgG2a, mIgG2a-N297A, and mIgG2a-DLE) to CHO cells expressing different mouse Fc $\gamma$  receptors (Fc $\gamma$ RI, IIB, III, and IV) with or without pre-blockade by deglycosylated Fc $\gamma$ RIV-specific mAb (clone 9E9, 10  $\mu$ g/ml).

**(I)** Anti-mouse Fc $\gamma$ RIV-specific mAb was deglycosylated with PNGase F. Glycosylation-dependent band shifts of the IgG heavy chain were evaluated by reducing SDS-PAGE.

**(J)** C57BL/6 mice were given sequential i.p. injections of glycosylated or deglycosylated anti-Fc $\gamma$ RIV mAb (clone 9E9) or a hamster IgG isotype control (200  $\mu$ g), together with SEB peptide (150  $\mu$ g) and anti-CTLA-4 mIgG2a or isotype control mAb (100  $\mu$ g) (n=4 mice). The frequency of V $\beta$ 8<sup>+</sup> effector (CD44<sup>+</sup> CD62L<sup>-</sup>) T cells was evaluated on day 6 by flow cytometry. Fold-change in IL-2 was calculated relative to a no mAb control (**C**, **D**, and **G**). Data are representative of three or more experiments. A Student's t test was used to calculate significance in (**D**, **G**, and **J**). Error bars indicate SEM; ns, not significant; \*\*, p<0.01; \*\*\*, p< 0.001.



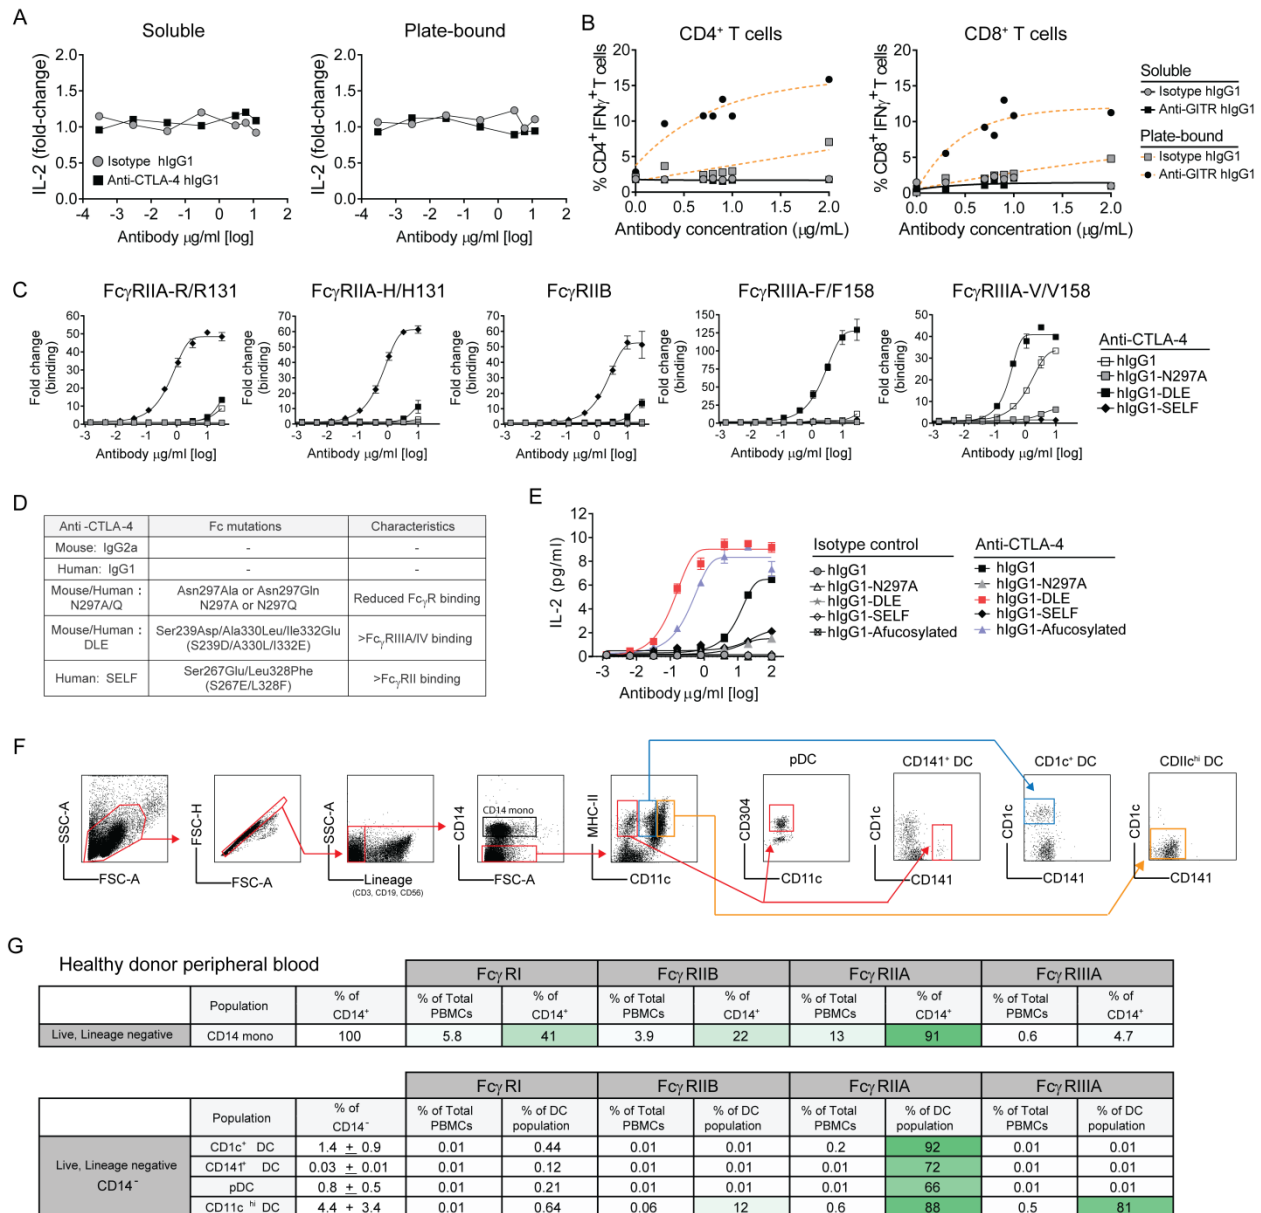

**Figure S5, related to Figure 5. Additional characterization of anti-human CTLA-4 mAb Fc variants and analysis of human PBMC Fc<sub>γ</sub>R expression.**

(A, B) T cells were isolated from human PBMCs and stimulated with anti-CD3 mAb (5 μg/ml) in combination with increasing concentrations of plate-bound (cross-linked) or soluble anti-CTLA-4 hIgG1, anti-GITR hIgG1, or a hIgG1 isotype control mAbs.

(A) IL-2 production (on day 4) from T cells treated with soluble or plate-bound anti-CTLA-4 mAb or hIgG1 isotype control.

(B) IFN<sub>γ</sub> production (day 3 post-mAb treatment) from anti-GITR hIgG1- or isotype hIgG1-treated CD4<sup>+</sup> and CD8<sup>+</sup> T cells was quantitated by intracellular flow cytometry.

(C) Binding of anti-human CTLA-4 mAb variants (hIgG1, hIgG1-N297A, hIgG1-SELF, and hIgG1-DLE) to CHO cells engineered to express human Fc<sub>γ</sub>Rs. Fold-change in Fc<sub>γ</sub>R binding

was determined by flow cytometry and calculated relative to the MFI of fluorochrome-conjugated F(ab')<sub>2</sub> secondary mAb alone.

**(D)** Summary of mAb Fc variant modifications and associated FcγR binding characteristics.

**(E)** IL-2 production (on day 4) by human PBMCs stimulated with 100 ng/ml of SEA peptide together with increasing concentrations of anti-CTLA-4 mAb variants (hIgG1, hIgG1-N297A, hIgG1-DLE, hIgG1-SELF, hIgG1-Afucosylated) or corresponding hIgG1 isotype control mAbs.

**(F)** Representative flow cytometry plots illustrating the gating used to identify DC (CD1c<sup>+</sup>, CD141<sup>+</sup>, CD304<sup>+</sup> (plasmacytoid DC, pDC)) and CD14<sup>+</sup> monocyte subsets from human PBMCs. Here “lineage negative” refers to CD3<sup>-</sup> CD19<sup>-</sup> CD56<sup>-</sup> cells.

**(G)** Percentage of FcγR<sup>+</sup> monocyte (lineage negative CD14<sup>+</sup>) and DC (lineage negative CD14<sup>-</sup>) subsets. Percent populations are of total PBMCs or of the indicated DC subset gates.

Fold-change in IL-2 was calculated relative to a no mAb control (**A** and **E**). Data are representative of three or more experiments. Error bars indicate SEM.

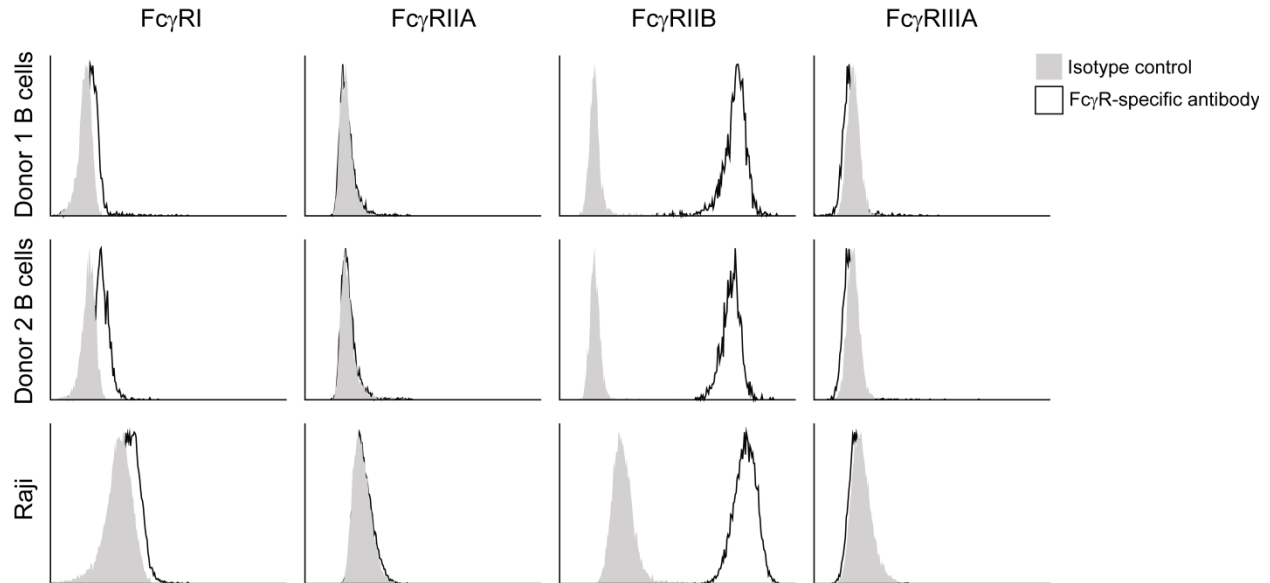

**Figure S6, related to Figure 6. Comparison of human B cell and Raji FcγR expression**

Representative flow cytometry profiles of FcγRs on human PBMC-derived CD3<sup>-</sup> CD20<sup>+</sup> B cells and Raji cells. Data are representative of three or more experiments and a minimum of three separate donor samples.
